# Supplementary material
Source: PubMed Central journal article supplement (PMC2937873)

## SUPPLEMENTAL DATA

Supplementary Fig. 1. Plasma membrane expression of TRPV5-WT and TRPV5-R707E. *A*, biotinylated fractions of TRPV-WT and TRPV5-R707E. *B*, protein input represents TRPV5 expression in total HEK293 cell lysates.

Supplementary Fig. 2. Plasma membrane expression of Ca<sup>2+</sup>-impermeable TRPV5-WT and TRPV5-H712D. *A*, biotinylation studies of HEK293 cells expressing either TRPV-WT or TRPV5-H712D in combination with the pore mutation TRPV5-D542A. *B*, protein input represents TRPV5 expression in total cell lysates.

### Supplementary Figure 1

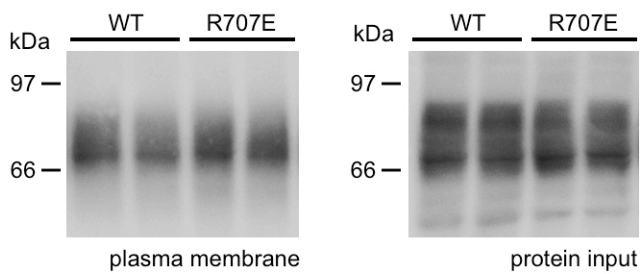

### Supplementary Figure 2

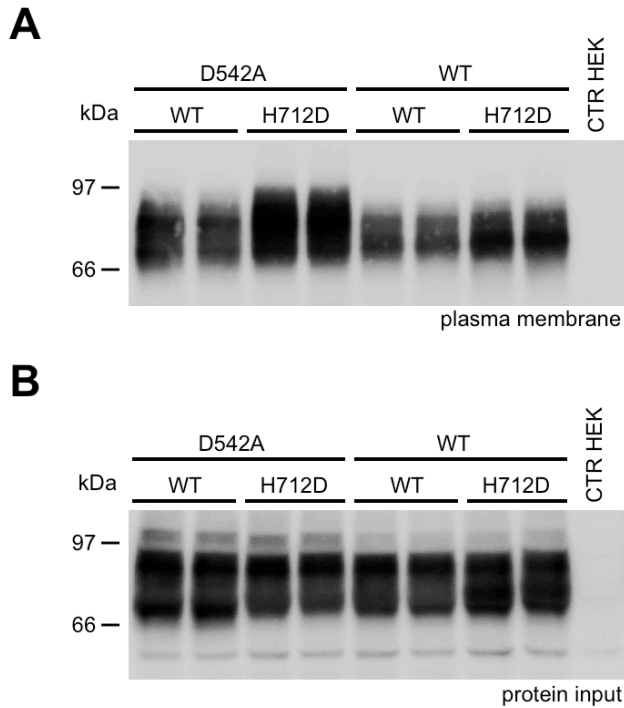

Supplement: supp_M110.117143_jbc.M110.117143-1.pdf [file supp_M110.117143_jbc.M110.117143-1.pdf]
